# Supplementary material
Source: PubMed Central journal article supplement (PMC9365349)
Supplement: ccr-21-1242_figure_s4_supps4.pdf [file ccr-21-1242_figure_s4_supps4.pdf]

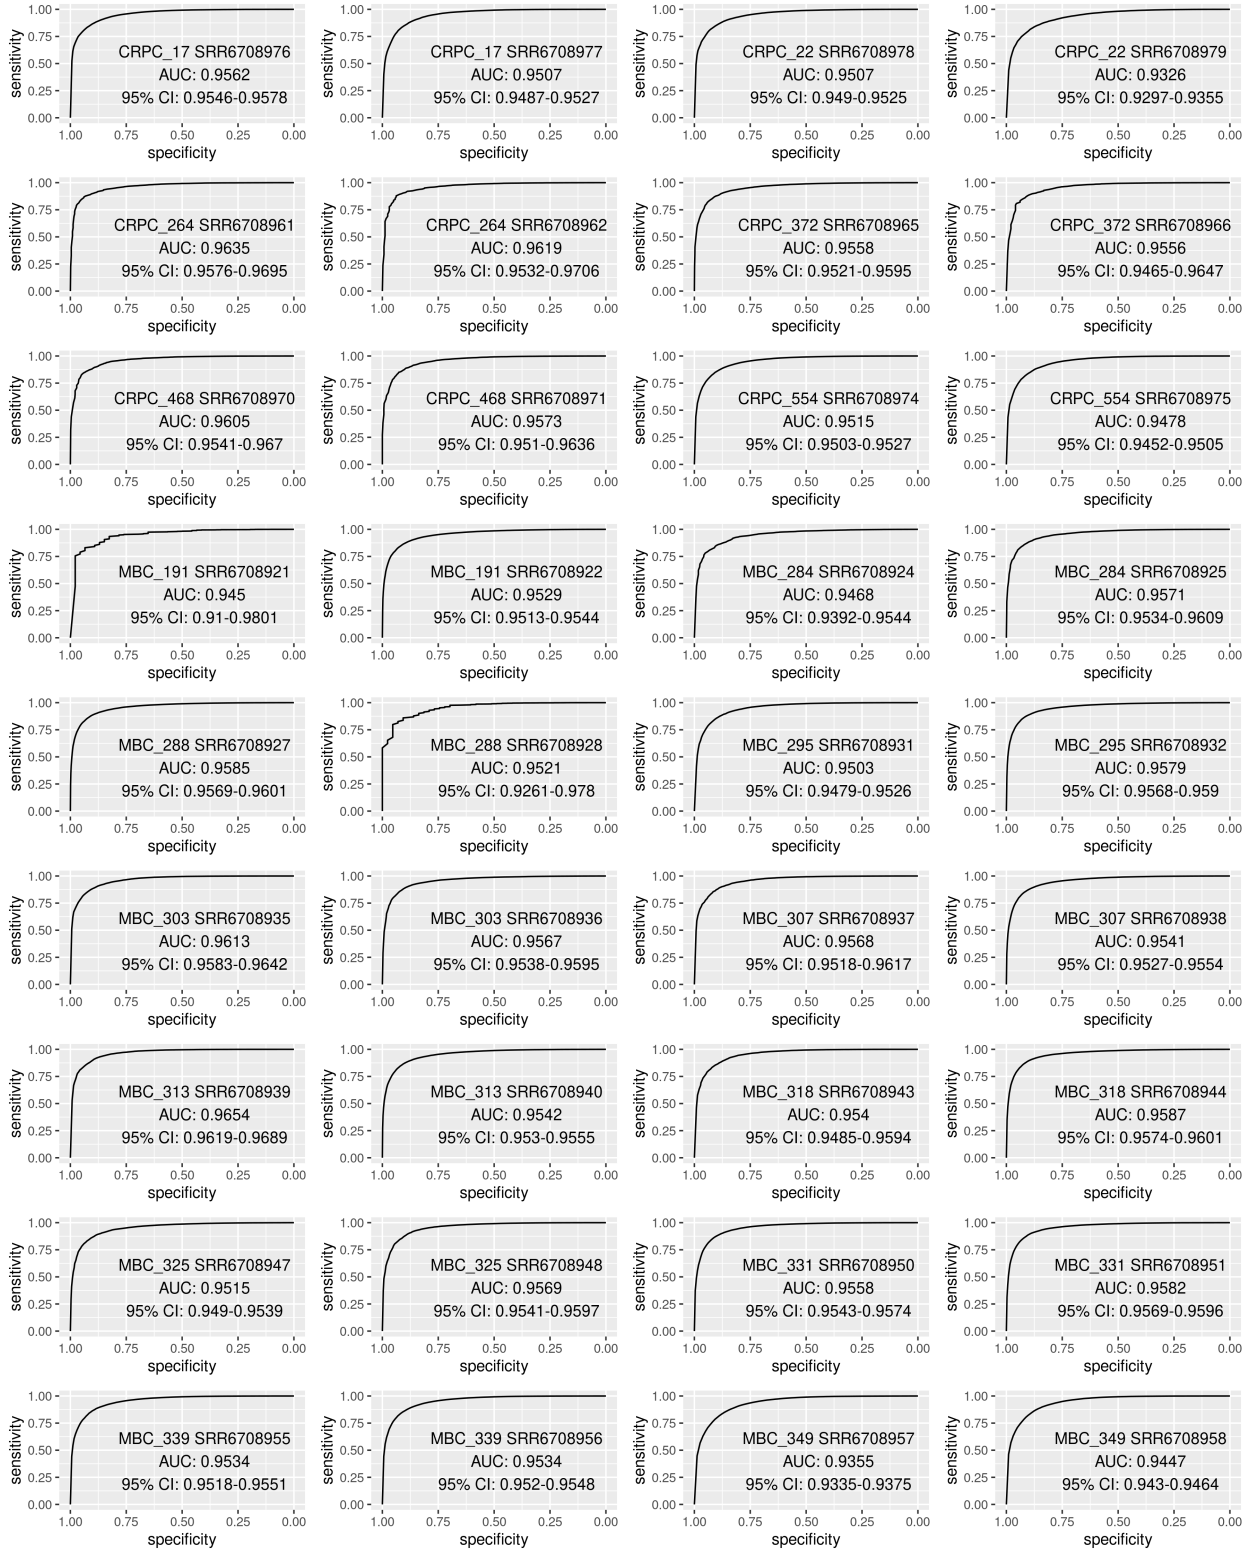

**Figure S4. Performance of the random forest model in the 36 cross-validation sets. The receiver operating characteristic (ROC) curve of the random forest model in the 36 cross-validation sets.**
