# Supplementary material
Source: PubMed Central journal article supplement (PMC9365349)
Supplement: ccr-21-1242_figure_s5_supps5.pdf [file ccr-21-1242_figure_s5_supps5.pdf]

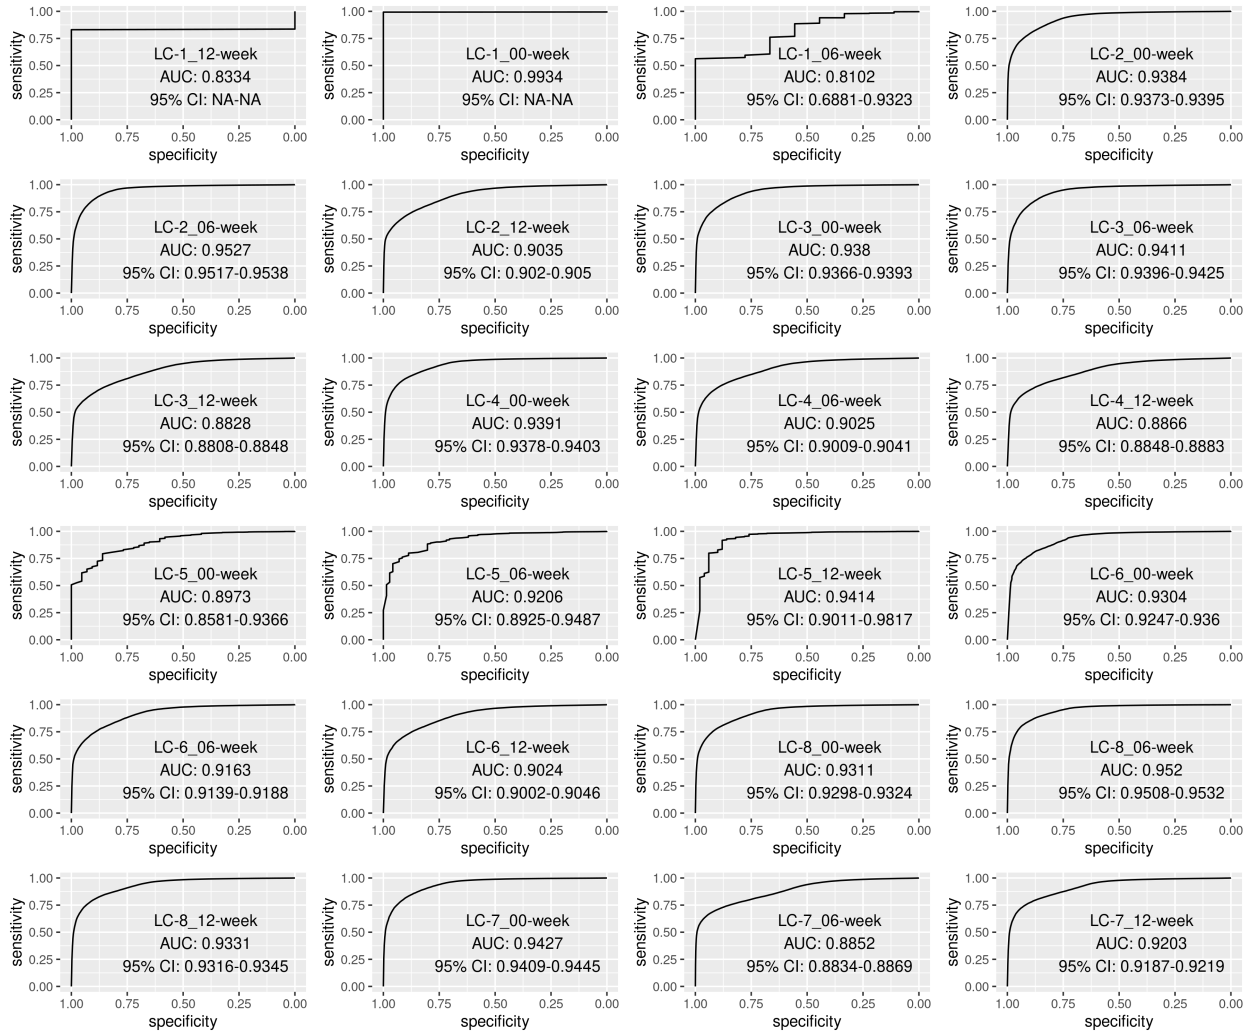

**Figure S5. Performance of the random forest model in the 24 independent testing datasets from 8 NSCLC patients.** The receiver operating characteristic (ROC) curve of the random forest model in the 24 independent datasets.
