# Supplementary material
Source: PubMed Central journal article supplement (PMC9365349)
Supplement: ccr-21-1242_figure_s7_supps7.pdf [file ccr-21-1242_figure_s7_supps7.pdf]

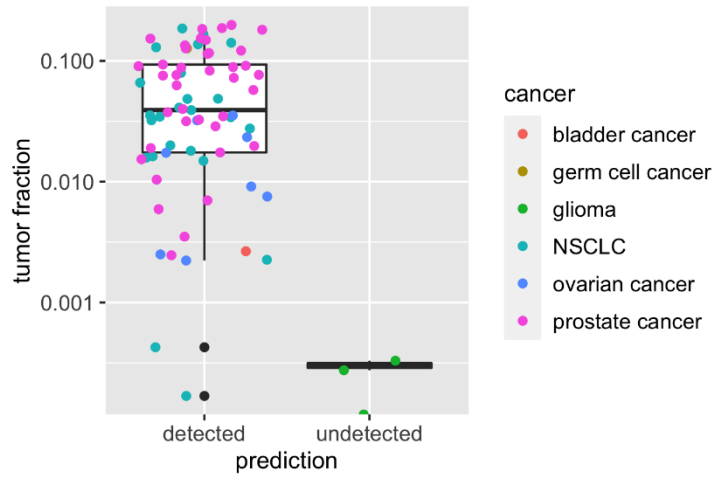

**Figure S7. Detection of tumor content in cfDNA from 35 cancer patients.** The dots indicate the cfDNA samples from cancer patients. Each cancer patient contributes 1 - 5 cfDNA samples. The detection of tumor content is based on the cutoff p-value = 0.05 of the background noise distribution.
