# Supplementary material
Source: PubMed Central journal article supplement (PMC9365349)
Supplement: ccr-21-1242_table_s1-s4_supps1-s4.pdf [file ccr-21-1242_table_s1-s4_supps1-s4.pdf]

## Supplementary Tables

| Feature description                                                         | Feature type | Nonoverlapping model | Overlapping model |
|-----------------------------------------------------------------------------|--------------|----------------------|-------------------|
| base call in a 7-bp window centered on the query site from the read         | categorical  | Yes                  | Yes               |
| base quality in a 7-bp window centered on the query site from the read      | numerical    | Yes                  | Yes               |
| CIGAR information in a 7-bp window centered on the query site from the read | categorical  | Yes                  | Yes               |
| occurrence CIGAR operators from the read                                    | Boolean      | Yes                  | Yes               |
| mapping quality of the read pair                                            | numerical    | Yes                  | Yes               |
| distance to the nearest indel on the read pair                              | numerical    | Yes                  | Yes               |
| whether the query site was contained in a homopolymer with a size $\geq 5$  | Boolean      | Yes                  | Yes               |
| insertion sizes of the read pair                                            | numerical    | Yes                  | Yes               |
| genome sequence in a 7-bp window centered on the query site                 | categorical  | Yes                  | Yes               |
| mapping flags of the read and the mate                                      | categorical  | Yes                  | Yes               |
| base call in a 7-bp window centered on the query site from the mate         | categorical  | No                   | Yes               |
| base quality in a 7-bp window centered on the query site from the mate      | numerical    | No                   | Yes               |
| CIGAR information in a 7-bp window centered on the query site from the mate | categorical  | No                   | Yes               |

**Table S1. Extracted features from read pairs for the random forest models.** The column “nonoverlapping model” indicates which features are used in the random forest model to filter nonoverlapping read pairs. The column “overlapping model” indicates which features are used in the model for overlapping read pairs.

| ID         |            | Error      |         | Variant    |         |
|------------|------------|------------|---------|------------|---------|
| Patient ID | Sample ID  | No Overlap | Overlap | No Overlap | Overlap |
| CRPC_17    | SRR6708976 | 15680      | 151     | 28570      | 24730   |
| CRPC_17    | SRR6708977 | 10789      | 1358    | 28185      | 25619   |
| CRPC_22    | SRR6708978 | 16282      | 144     | 28622      | 24474   |
| CRPC_22    | SRR6708979 | 6927       | 97      | 27933      | 23840   |
| CRPC_264   | SRR6708961 | 509        | 225     | 27052      | 24457   |
| CRPC_264   | SRR6708962 | 319        | 99      | 27122      | 23835   |
| CRPC_372   | SRR6708965 | 1646       | 584     | 26069      | 23315   |
| CRPC_372   | SRR6708966 | 396        | 92      | 27065      | 24682   |
| CRPC_468   | SRR6708970 | 504        | 198     | 32441      | 29473   |
| CRPC_468   | SRR6708971 | 510        | 239     | 31484      | 27138   |
| CRPC_554   | SRR6708974 | 45617      | 845     | 33894      | 30638   |
| CRPC_554   | SRR6708975 | 9434       | 435     | 33687      | 30218   |
| MBC_191    | SRR6708921 | 39         | 3       | 33692      | 30424   |
| MBC_191    | SRR6708922 | 12953      | 5129    | 32565      | 28987   |
| MBC_284    | SRR6708924 | 594        | 124     | 32020      | 26885   |
| MBC_284    | SRR6708925 | 1726       | 612     | 32400      | 29515   |
| MBC_288    | SRR6708927 | 9658       | 3366    | 32654      | 29815   |
| MBC_288    | SRR6708928 | 38         | 4       | 32852      | 28932   |
| MBC_295    | SRR6708931 | 8895       | 370     | 33720      | 28268   |
| MBC_295    | SRR6708932 | 34007      | 10810   | 32476      | 27214   |
| MBC_303    | SRR6708935 | 3353       | 117     | 34204      | 31599   |
| MBC_303    | SRR6708936 | 3144       | 1126    | 31067      | 26469   |
| MBC_307    | SRR6708937 | 1383       | 40      | 33354      | 29336   |
| MBC_307    | SRR6708938 | 21055      | 5974    | 32663      | 29378   |
| MBC_313    | SRR6708939 | 2292       | 70      | 33820      | 30856   |
| MBC_313    | SRR6708940 | 21503      | 8790    | 31725      | 28822   |
| MBC_318    | SRR6708943 | 1330       | 51      | 33391      | 30548   |
| MBC_318    | SRR6708944 | 16734      | 5850    | 32684      | 29834   |
| MBC_325    | SRR6708947 | 5099       | 2431    | 29623      | 27158   |

|         |              |       |       |       |       |
|---------|--------------|-------|-------|-------|-------|
| MBC_325 | SRR6708948   | 6120  | 1521  | 32499 | 29882 |
| MBC_331 | SRR6708950   | 14813 | 4030  | 32628 | 29610 |
| MBC_331 | SRR6708951   | 17448 | 5969  | 32055 | 28088 |
| MBC_339 | SRR6708955   | 28526 | 1651  | 34122 | 30393 |
| MBC_339 | SRR6708956   | 28212 | 1446  | 34088 | 29869 |
| MBC_349 | SRR6708957   | 17462 | 532   | 33951 | 31605 |
| MBC_349 | SRR6708958   | 19876 | 436   | 34059 | 31567 |
| LC-1    | LC-1_12-week | 1     | 0     | 34188 | 34003 |
| LC-1    | LC-1_00-week | 0     | 1     | 32863 | 33395 |
| LC-1    | LC-1_06-week | 4     | 2     | 34186 | 34068 |
| LC-2    | LC-2_00-week | 48627 | 19237 | 34227 | 34139 |
| LC-2    | LC-2_06-week | 38567 | 12011 | 33316 | 33900 |
| LC-2    | LC-2_12-week | 54542 | 7655  | 34522 | 33087 |
| LC-3    | LC-3_00-week | 24672 | 9970  | 32821 | 33588 |
| LC-3    | LC-3_06-week | 19354 | 6022  | 33109 | 33642 |
| LC-3    | LC-3_12-week | 24949 | 5439  | 34582 | 34155 |
| LC-4    | LC-4_00-week | 34884 | 12337 | 32299 | 33056 |
| LC-4    | LC-4_06-week | 38017 | 12905 | 33568 | 33659 |
| LC-4    | LC-4_12-week | 40591 | 12438 | 33622 | 33614 |
| LC-5    | LC-5_00-week | 24    | 11    | 33873 | 33887 |
| LC-5    | LC-5_06-week | 46    | 9     | 33248 | 33635 |
| LC-5    | LC-5_12-week | 22    | 9     | 33244 | 33738 |
| LC-6    | LC-6_00-week | 1071  | 422   | 31756 | 33222 |
| LC-6    | LC-6_06-week | 7433  | 2075  | 34431 | 34373 |
| LC-6    | LC-6_12-week | 13020 | 2695  | 34688 | 34389 |
| LC-8    | LC-8_00-week | 36161 | 12359 | 30874 | 30758 |
| LC-8    | LC-8_06-week | 22368 | 9583  | 30620 | 30743 |
| LC-8    | LC-8_12-week | 23331 | 10328 | 30772 | 30731 |
| LC-7    | LC-7_00-week | 9345  | 4080  | 34467 | 34522 |
| LC-7    | LC-7_06-week | 28379 | 19286 | 34878 | 34570 |
| LC-7    | LC-7_12-week | 17077 | 14692 | 33156 | 33922 |

**Table S2. Sample IDs and the number of labeled read pairs for training and testing the random forest model.** For the MBC patients and CRPC patients, the patient IDs follow the naming convention in [1], while the sample IDs are the SRA accession IDs of the sample.

| <b>Patient ID</b> | <b>PFS (days)</b> | <b>Group</b>      |
|-------------------|-------------------|-------------------|
| LC-1              | 133               | Early Progressor  |
| LC-2              | 131               | Early Progressor  |
| LC-3              | 812               | Durable Responder |
| LC-4              | 951               | Durable Responder |
| LC-5              | 917               | Durable Responder |
| LC-6              | 105               | Early Progressor  |
| LC-7              | 84                | Early Progressor  |
| LC-8              | > 1825            | Durable Responder |

**Table S3. Progression-free survival (PFS) of the 8 non-small-cell lung cancer patients.**

| <b>patient</b> | <b>1st serum</b>                  | <b>2nd serum</b>                         | <b>Time in between (months)</b> | <b>Notes for chemotherapy</b> |
|----------------|-----------------------------------|------------------------------------------|---------------------------------|-------------------------------|
| OV1            | pre-chemotherapy                  | post-chemotherapy and pre-surgery        | 3.37                            | Moderate treatment effect     |
| OV2            | pre-chemotherapy                  | post-chemotherapy and pre-surgery        | 2.60                            | Moderate treatment effect     |
| OV3            | pre-chemotherapy                  | post-chemotherapy and pre-surgery        | 2.60                            | Moderate treatment effect     |
| OV4            | post-chemotherapy and pre-surgery | post-surgery and chemotherapy recurrence | 9.57                            |                               |

**Table S4. Clinical information of the 8 serum samples from the 4 ovarian cancer patients at UCLA.**

## **References**

- [1] Adalsteinsson, Viktor A., et al. "Scalable whole-exome sequencing of cell-free DNA reveals high concordance with metastatic tumors." *Nature communications* 8.1 (2017): 1-13.
